# Supplementary material
Source: publisher figshare collection journal article supplement (https://acs.figshare.com/ndownloader/files/3919249)
Supplement: Supplementary file 1 [file 3919249]

## Supporting Information

# ***Oligo(p-phenyleneethynylene)* Derived Porous Luminescent Nanoscale Coordination Polymer of Gd<sup>III</sup>: Bimodal Imaging and Nitroaromatic Sensing**

Venkata M Suresh,<sup>†</sup> Snehajyoti Chatarjee,<sup>‡</sup> Rahul Modak,<sup>‡</sup> Vivek Tiwari,<sup>§</sup> Anant B Patel,<sup>§</sup>

Tapas K Kundu,<sup>‡</sup> and Tapas Kumar Maji\*,<sup>†</sup>

<sup>†</sup>Molecular Materials Laboratory, Chemistry and Physics of Materials Unit, Jawaharlal Nehru Centre for Advanced Scientific Research (JNCASR), Jakkur, Bangalore, India-560064

<sup>‡</sup>Transcription and Disease Laboratory, Molecular Biology and Genetics Unit, Jawaharlal Nehru Centre for Advanced Scientific Research (JNCASR), Jakkur, Bangalore, India-560064

<sup>§</sup>NMR Microimaging and Spectroscopy, Centre for Cellular & Molecular Biology, Uppal Road, Hyderabad, India-500007

\*Corresponding Author Tel: +91-80-22082826; e-mail address: tmaji@jncasr.ac.in

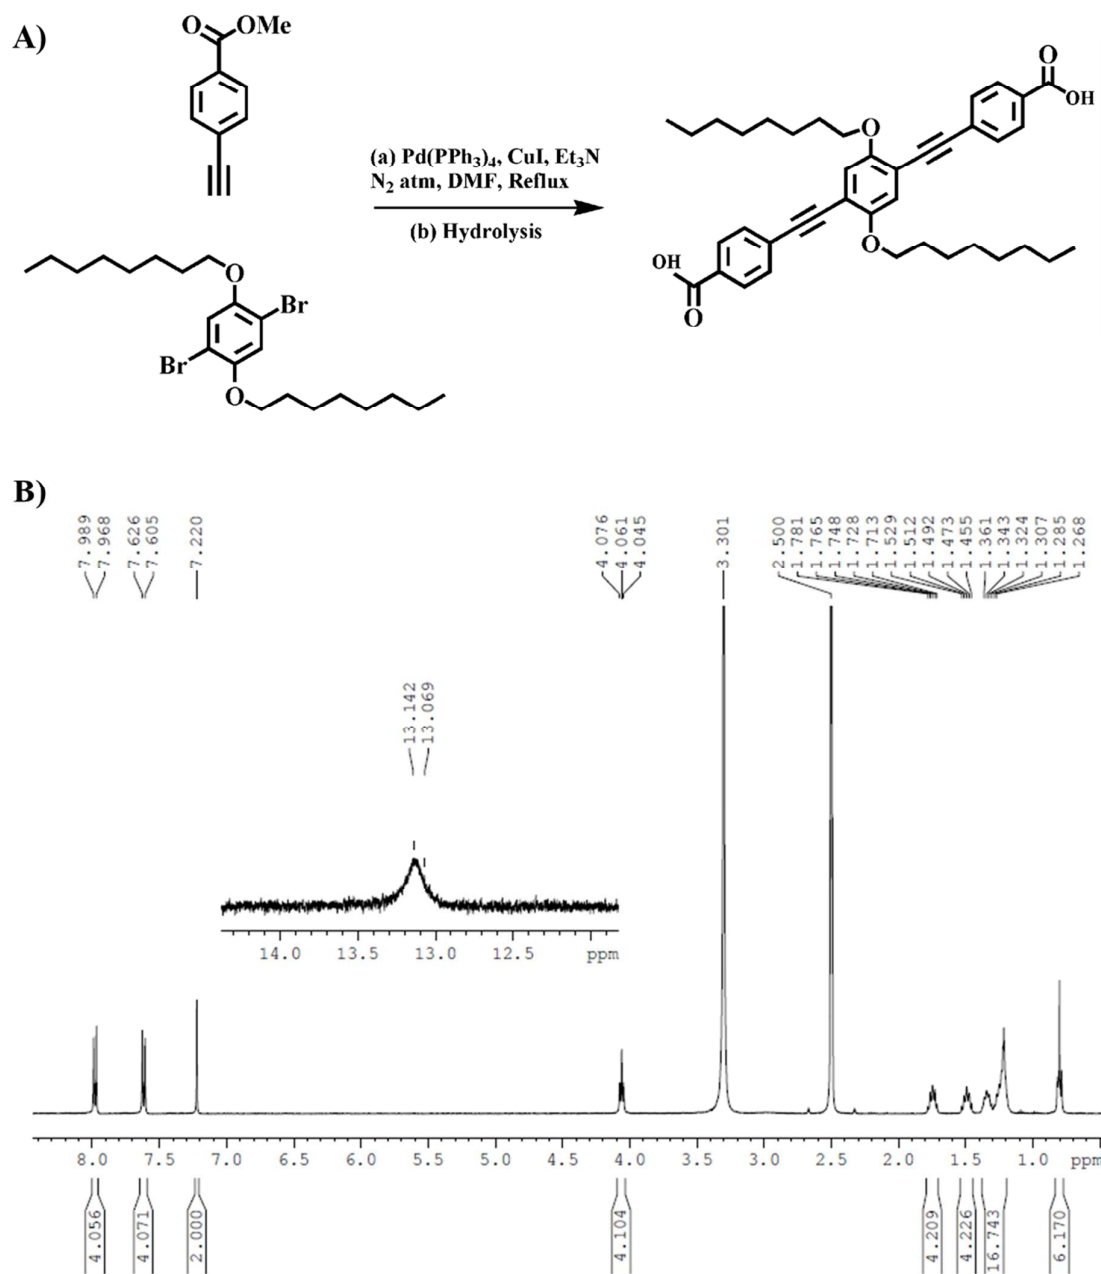

**Figure S1.** A) Synthetic scheme of OPEA ligand and B)  $^1\text{H}$  NMR spectra of OPEA in  $\text{dms-}d_6$ .

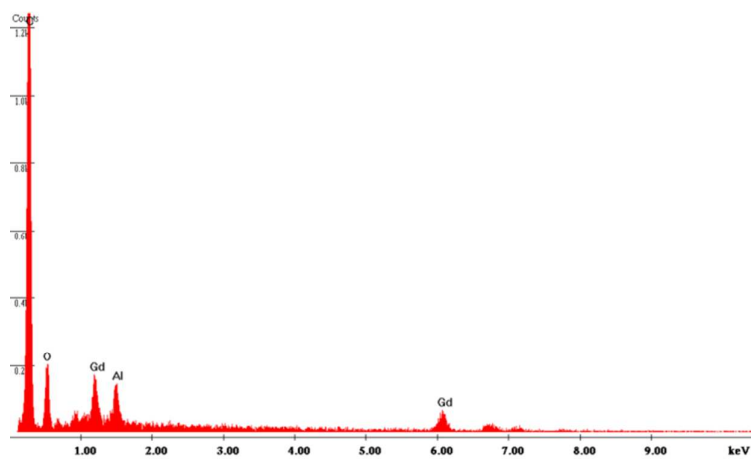

**Figure S2.** Energy dispersive X-ray analysis (EDAX) of NCP-1.

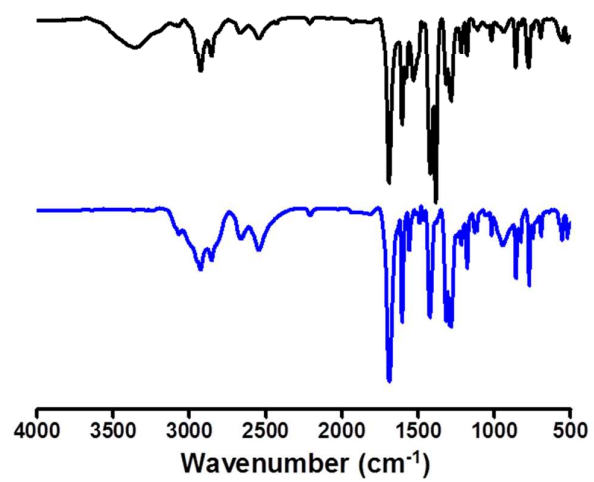

**Figure S3.** FTIR spectra of OPEA (blue) and NCP-1 (black).

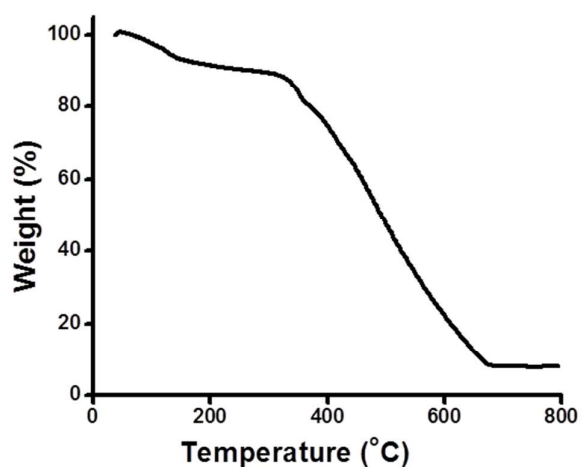

**Figure S4.** TGA curve of NCP-1 in the temperature range of 30-800 °C with a heating rate of 5 °C/min.

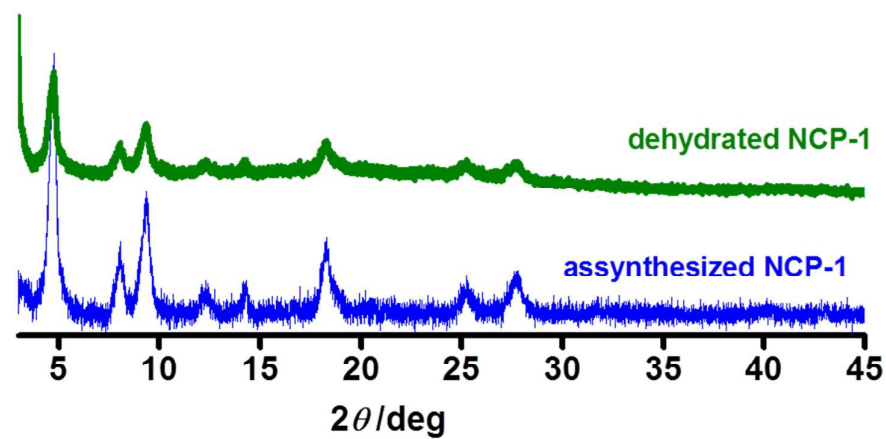

**Figure S5.** PXRD patterns of assynthesized NCP-1 (blue) and dehydrated NCP-1 (green) showing the stability of compound on removal of guest molecules.

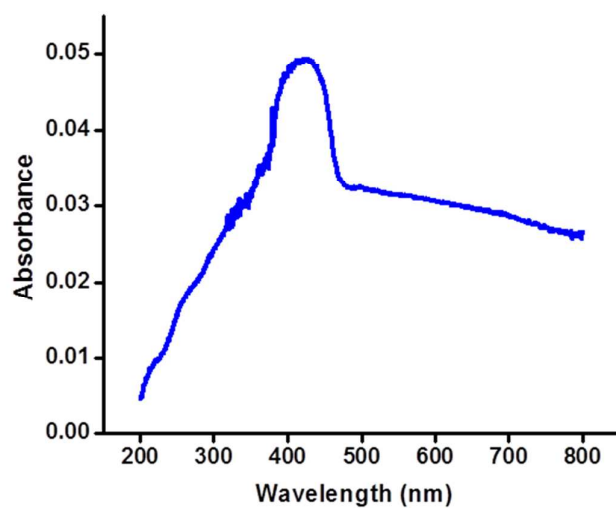

**Figure S6.** Solid state absorbance spectra of NCP-1.

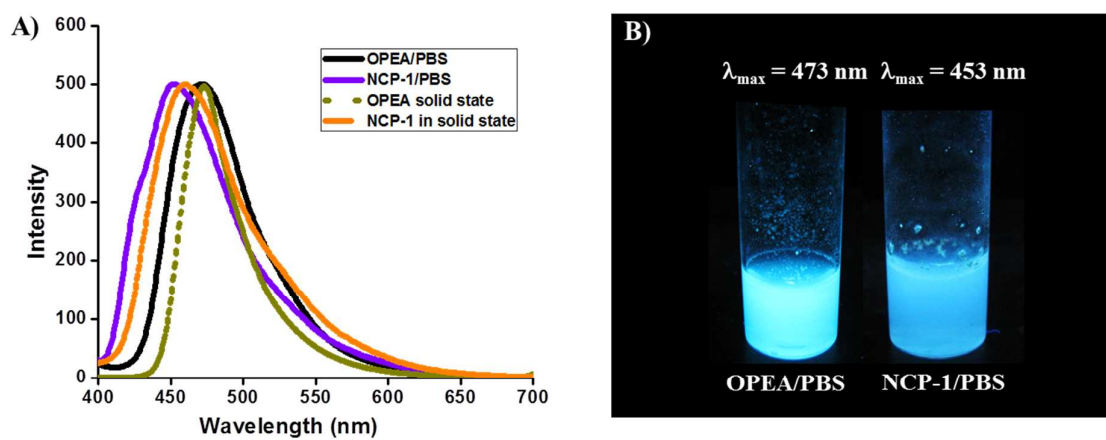

**Figure S7.** A) Fluorescence spectra; OPEA in solid state (dark yellow), OPEA in PBS (black), NCP-1 in solid state (orange) and NCP-1 in PBS buffer (violet). Excitation wavelength is 390 nm in all cases. B) Images of OPEA and NCP-1 dispersed in PBS buffer under UV light.

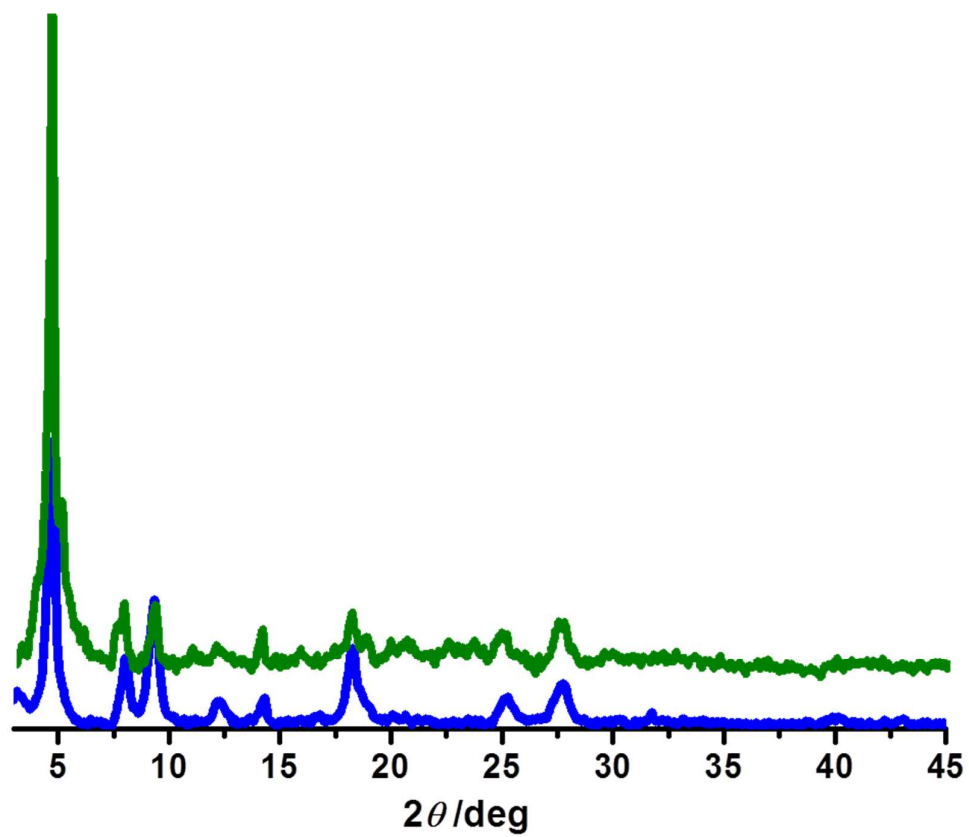

**Figure S8.** Powder X-ray diffraction pattern of assynthesized NCP-1 (blue) and NCP-1 incubated in PBS (green).

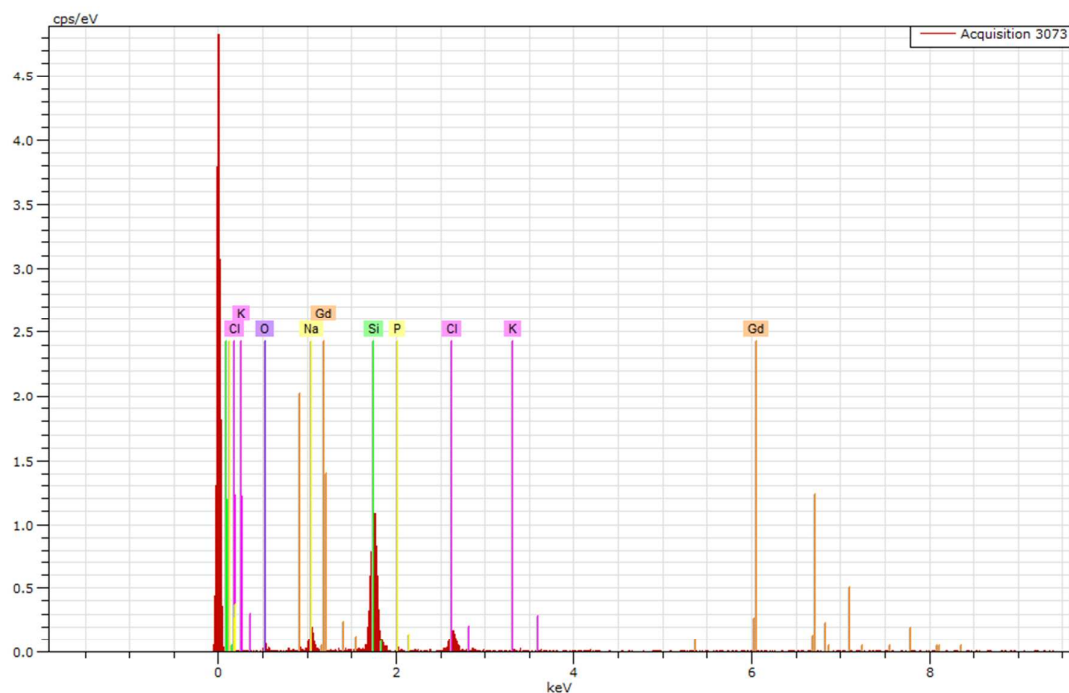

Spectrum: Acquisition 3073

| El     | AN | Series   | unn. C<br>[wt.%] | norm. C<br>[wt.%] | Atom. C<br>[at.%] | Error<br>[wt.%] |
|--------|----|----------|------------------|-------------------|-------------------|-----------------|
| Si     | 14 | K-series | 55.31            | 61.41             | 58.14             | 2.8             |
| Cl     | 17 | K-series | 14.70            | 16.32             | 12.24             | 1.0             |
| Na     | 11 | K-series | 10.04            | 11.15             | 12.90             | 1.1             |
| O      | 8  | K-series | 8.14             | 9.04              | 15.03             | 5.9             |
| P      | 15 | K-series | 1.37             | 1.53              | 1.31              | 0.3             |
| K      | 19 | K-series | 0.50             | 0.56              | 0.38              | 0.2             |
| Gd     | 64 | L-series | 0.00             | 0.00              | 0.00              | 0.0             |
| Total: |    |          | 90.07            | 100.00            | 100.00            |                 |

**Figure S9.** EDAX analysis of decant obtained from **NCP-1** incubated in PBS showing no leaching of  $\text{Gd}^{\text{III}}$  ions into the solution suggesting stability of **NCP-1** under physiological conditions.

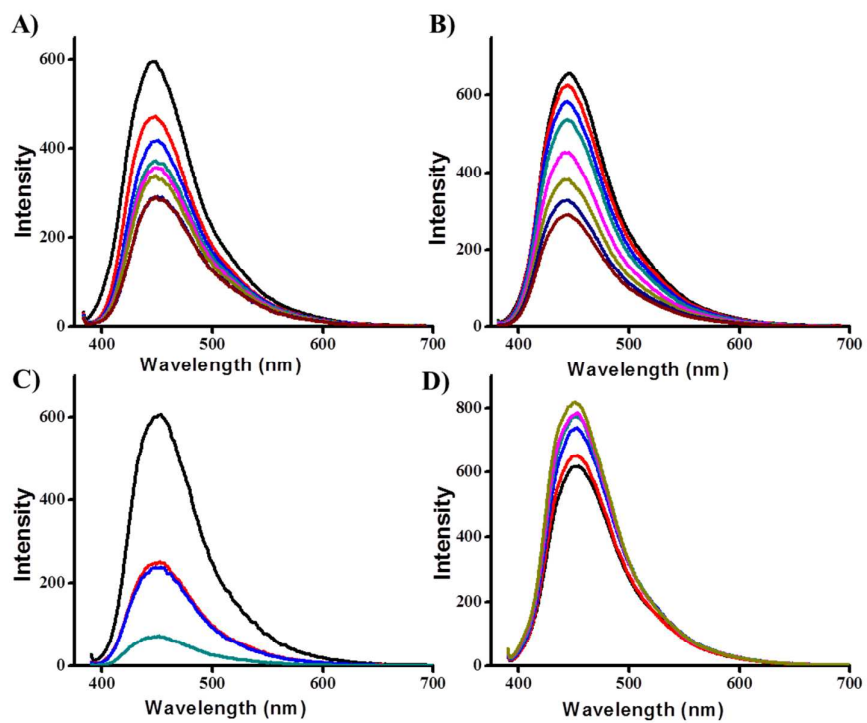

**Figure S10.** Fluorescence behaviour of **NCP-1** in presence of A) nitromethane ( $1 \times 10^{-3}$  M), B) *o*-nitrophenol ( $3 \times 10^{-3}$  M), C) nitrobenzene ( $1 \times 10^{-4}$  M) and D) toluene. Black curves represent fluorescence intensity of **NCP-1** before analyte addition.
